# Supplementary material for: Pancreatic Islet Autoantibodies as Predictors of Type 1 Diabetes in the Diabetes Prevention Trial–Type 1
Source: PubMed Central journal article supplement — Diabetes Care. 2009 Sep 9;32(12):2269–74. doi: 10.2337/dc09-0934 (PMC2782989; doi:10.2337/dc09-0934), 2009-09-09

**ONLINE APPENDIX**  
**Pancreatic Islet Autoantibodies as Predictors of Type 1 Diabetes in**  
**the Diabetes Prevention Trial-Type 1 (DPT-1)**

**Table A1** Associations\* of T1D Occurrence with the Presence of Single Autoantibodies in the Combined Cohorts at Initial Screening

|        | T1D/Total | Percent | Hazard Ratio | 95% CI                 |
|--------|-----------|---------|--------------|------------------------|
| GAD65  | 27/582    | 4.6     | 20.6         | 13.0-32.7 <sup>+</sup> |
| ICA512 | 6/113     | 5.3     | 23.4         | 9.8-56.0 <sup>+</sup>  |
| mIAA   | 0/410     | 0       | ---          | ---                    |
| ICA    | 29/472    | 6.1     | 30.2         | 19.2-47.6 <sup>+</sup> |

\*Reference Group: Negative for all autoantibodies (T1D/Total=55/26,707)

<sup>+</sup> p<0.001

**Figure A1** The curves indicate the occurrence of T1D in the Questionnaire cohort over follow-up for the presence of two autoantibodies and for the additional presence of a third autoantibody at the initial screening. Thus, in each panel the groups that included a specific third positive autoantibody was compared with the group that had two positive autoantibodies from any of the others. The panels show that the occurrence of T1D increased appreciably when ICA and ICA512 each were present as third autoantibodies. Both GAD65 and mIAA appear to have had a minimal effect when they were present as third autoantibodies. The number shown for each curve (2,3) indicates the number of autoantibodies. Proportions of those who developed T1D are shown for each curve. (The fraction in parentheses indicates the number who developed T1D among the number in the group at baseline.)

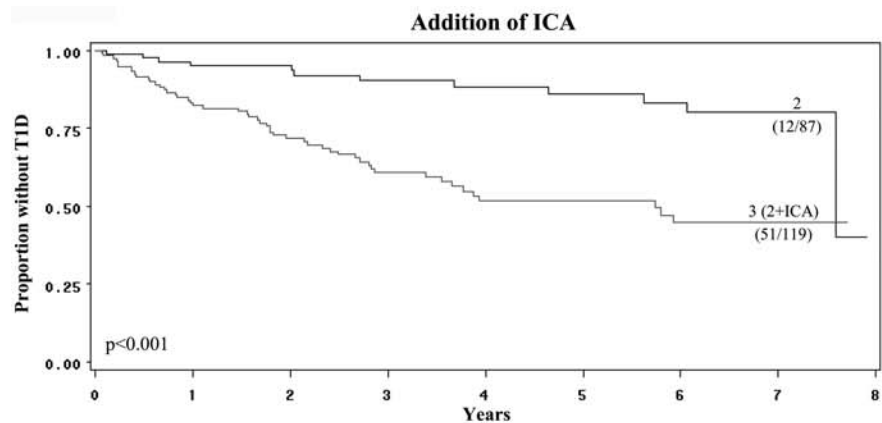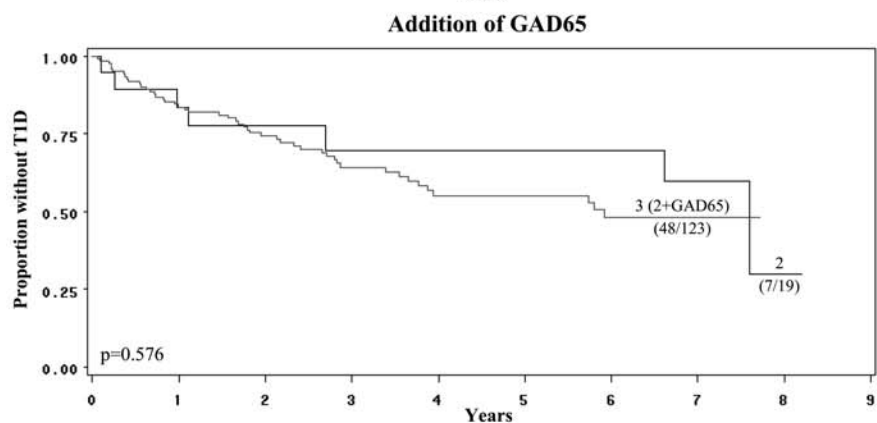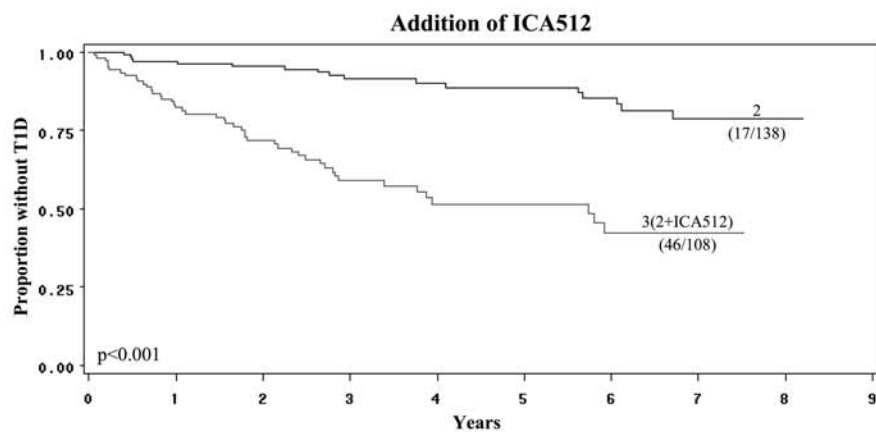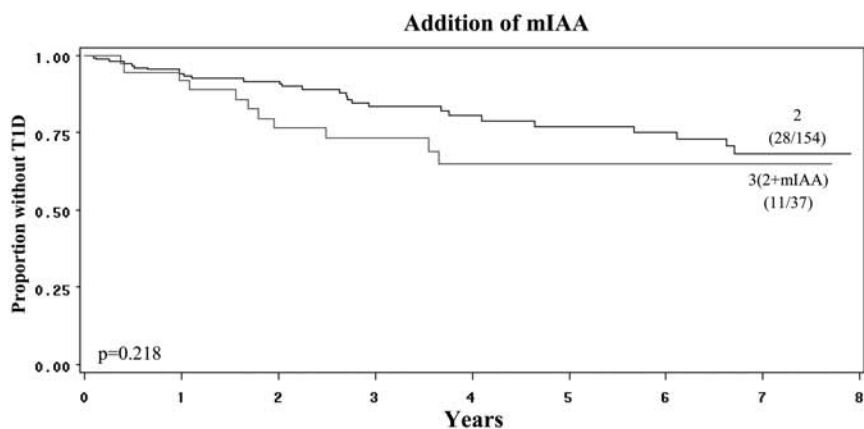

Supplement: supp_dc09-0934_dc09-0934_ONLINE_APPENDIX.pdf [file supp_dc09-0934_dc09-0934_ONLINE_APPENDIX.pdf]
